# Supplementary material
Source: PubMed Central journal article supplement (PMC5666652)
Supplement: EMBR-18-1968-s001.pdf [file EMBR-18-1968-s001.pdf]

# Appendix

## Table of Contents

|                                                                                                                                                      |   |
|------------------------------------------------------------------------------------------------------------------------------------------------------|---|
| Appendix Table S1: Orthologous genes of TbKKTs in the genome of <i>L. major</i> : LmKKTs.....                                                        | 1 |
| Appendix Figure S1: Chromosome 29: comparison of the results obtained using fold-change <i>versus</i> subtraction methods for ChIP-seq analysis..... | 2 |
| Appendix Figure S2: PCR failed to amplify intergenic regions A and B. ....                                                                           | 3 |
| Appendix Table S2: List of the primers used to amplify intergenic regions A and B.....                                                               | 3 |
| Appendix Figure S3: DNA motifs characterizing the centromeres of <i>T. brucei</i> (TbKKT3 binding sites) .....                                       | 4 |
| Appendix TableS2 : Presence and Localization Retroposons in the Leishmania major centromeric sequences .....                                         | 5 |

## Appendix Table S1: Orthologous genes of TbKKTs in the genome of *L. major*: LmKKTs

| Name   | <i>T.brucei</i> | <i>L.major</i> | Similarity (%) | Identity(%) |
|--------|-----------------|----------------|----------------|-------------|
| KKT1   | Tb927.10.6330   | LmjF.36.1900   | 53             | 36.2        |
| KKT2   | Tb927.11.10520  | LmjF.36.5350   | 61.9           | 46.9        |
| KKT3   | Tb927.9.10920   | LmjF.35.4050   | 51             | 38.5        |
| KKT4   | Tb927.8.3680    | LmjF.10.0300   | 43             | 29.9        |
| KKT5   | Tb927.7.4850    | LmjF.06.0200   | 57             | 36          |
| KKT6   | Tb927.6.1210    | LmjF.12.0080   | 67.8           | 50.5        |
| KKT7   | Tb927.11.1030   | LmjF.27.0430   | 36.6           | 24.4        |
| KKT8   | Tb927.4.5110    | LmjF.31.2750   | 46.1           | 30          |
| KKT9   | Tb927.8.1150    | LmjF.02.0610   | 42.8           | 26.2        |
| KKT10* | Tb927.11.12410  | LmjF.09.0410   | 74.3           | 65          |
|        |                 | LmjF.09.0400   | 79             | 70          |
| KKT11  | Tb927.7.2110    | LmjF.22.0120   | 48.6           | 25.3        |
| KKT12  | Tb927.8.1680    | LmjF.24.1400   | 51             | 29          |
| KKT13  | Tb927.7.4860    | LmjF.06.0210   | 26             | 17.9        |
| KKT14  | Tb927.10.7240   | LmjF.36.2800   | 39.6           | 27.5        |
| KKT15  | Tb927.6.3760    | LmjF.30.2520   | 51.5           | 36.2        |
| KKT16  | Tb927.11.1000   | LmjF.27.0400   | 45.1           | 24.6        |
| KKT17  | Tb927.3.2330    | LmjF.25.2220   | 52.8           | 36          |
| KKT18  | Tb927.9.3800    | LmjF.01.0350   | 43.6           | 28.7        |
| KKT19* | Tb927.11.12420  | LmjF.09.0410   | 71.1           | 62.7        |
|        |                 | LmjF.09.0400   | 74.2           | 66.1        |
| KKT20  | Tb927.8.4760    | LmjF.10.1227   | 31.8           | 18.5        |

\* TbKKT19 and TbKKT10 share 82.5% similarity and 79.8% identity

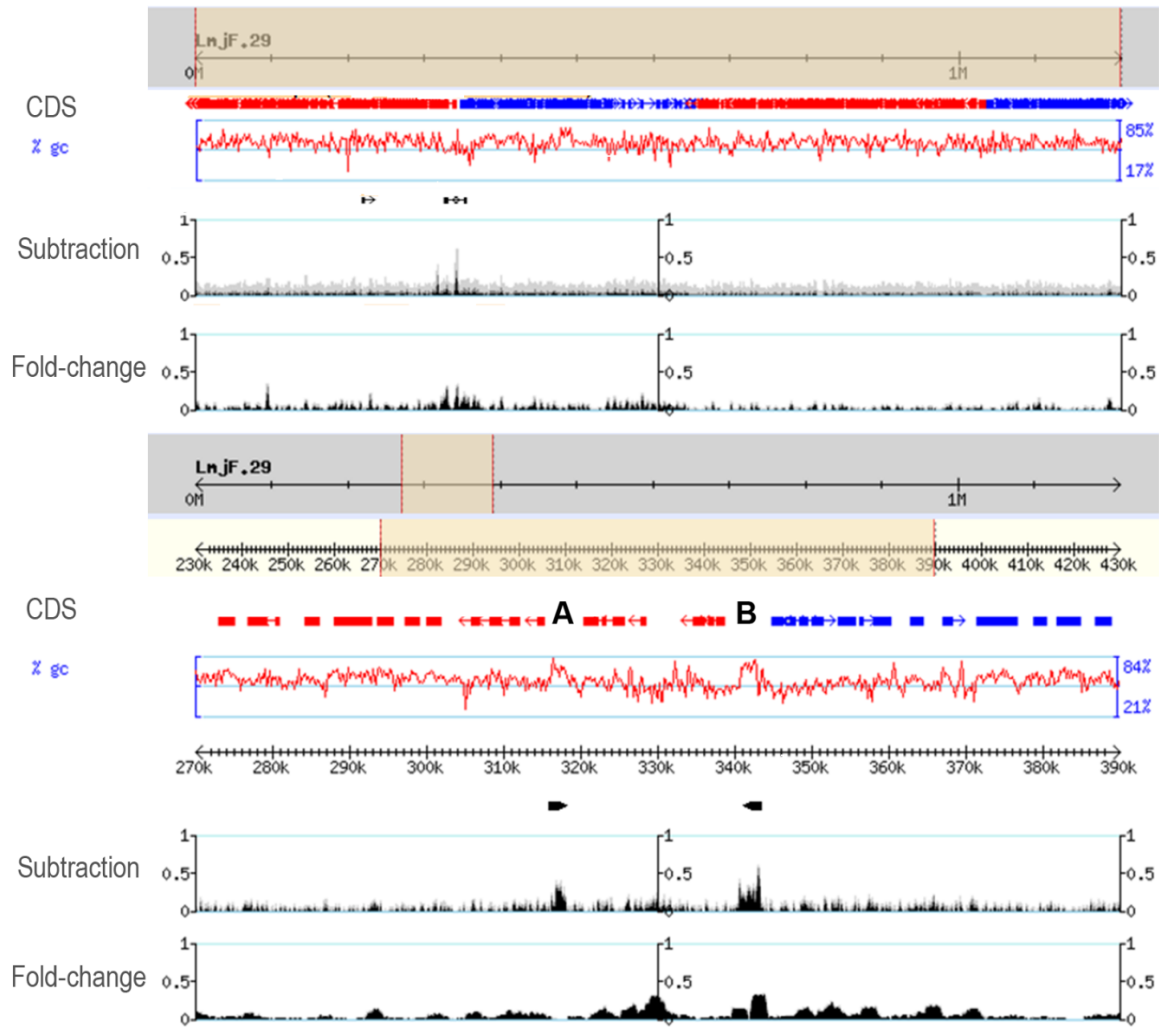

### Appendix Figure S1: Chromosome 29: comparison of the results obtained using fold-change *versus* subtraction methods for ChIP-seq analysis.

Chromosome #29 is the only chromosome for which a clear peak was not obtained by ChIP-seq; on the contrary, it gives a very "noisy" dataset, in particular when using the fold-change-method to discriminate noise from signal. A simple subtraction after normalization to separate noise from signal; and indeed the subtraction method allowed us to distinguish a major peak and a minor peak, both being separated by 25 kb and sharing sequence similarities. Top panel: whole chromosome; lower panel: zoom-in view, A: intergenic region LmjF.29:315250..320300 and B: intergenic region LmjF.29:338691..344823.

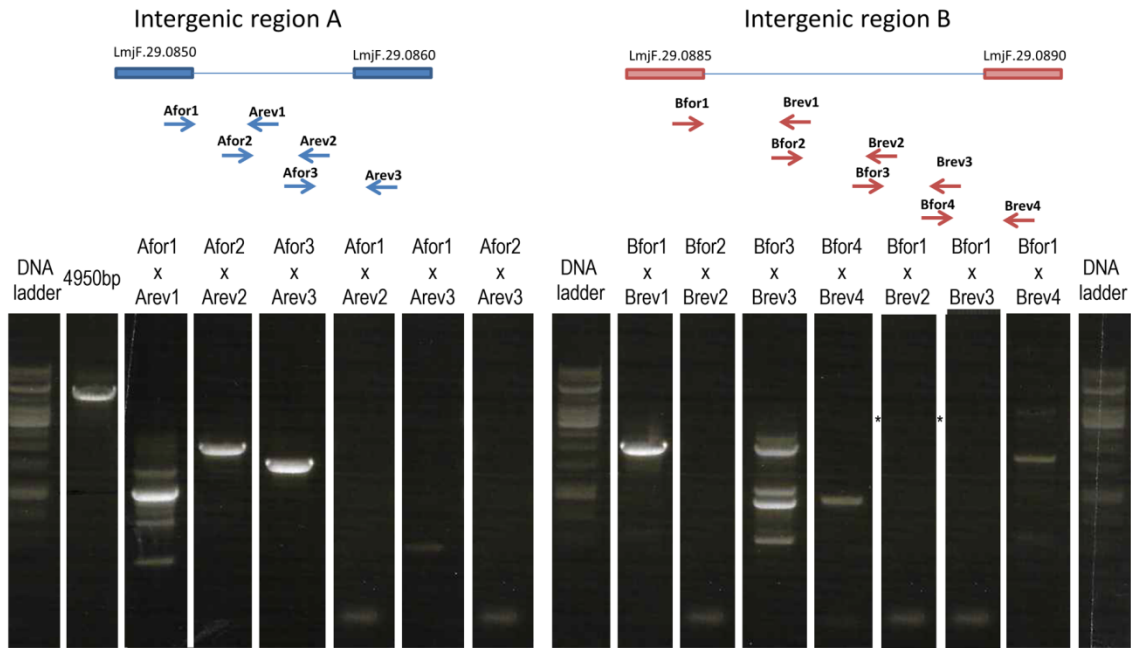

### Appendix Figure S2: PCR failed to amplify intergenic regions A and B.

Chr. #29 has the same statistics regarding mapped reads as all other chromosomes, so there is no unfortunate sequencing bias that could explain this. One possible explanation is that the centromeric region of chromosome 29 may have not been properly assembled in the sequence available in TritrypDB. This same explanation had been alleged by Akiyoshi & Gull (Cell 2014) for Chr. 9, 10 and 11 of *T. brucei*. This hypothesis is further supported by the fact that both regions LmjF.29:315250..320300 and LmjF.29:338691..344823 (so-called intergenic region A and B) share sequence similarities. Indeed, a large 2244-bp region is perfectly duplicated, but inverted, in the positions LmjF.29:316100..318343 and LmjF.29:342885..340642; another smaller fragment of 114 bp was found in LmjF.29:20722..208354 (Appendix Figure S1, top panel). PCR primers were designed to map the intergenic regions A and B. The expected product sizes were 2000 bp and 5000 bp depending on the primer pairs. A 4950bp positive control was successfully amplified (Lane 2). Some of the PCR products were successfully amplified (Lane 4 (Afor2xArev2), 5 (Afor3xArev3), 10 (Bfor1xBrev1), 13 (Bfor4xBrev4) and the sequence verified by sequencing. For Bfor1xBrev2, a faint band (\*\*\*) was visible at the expected size (4000bp) but could not be sequenced. All the other primer pairs failed to give a specific product at the expected size. For the list of primers see Appendix Table S2).

### Appendix Table S2: List of the primers used to amplify intergenic regions A and B

| SSR A  |                       | SSR B  |                      |
|--------|-----------------------|--------|----------------------|
| A-for1 | ccgacatcgtgatgatctcc  | B-for1 | taattgcagcttcccgcagc |
| A-rev1 | cagcatctttctgcggcagc  | B-rev1 | acggcgtccatccttcaagg |
| A-for2 | cccagacacgaaaaagtcagc | B-for2 | tccagacgcaaagctgacg  |
| A-rev2 | cgggaagctctctgatgagg  | B-rev2 | gagcgaagcaaccacgtcc  |
| A-for3 | ccggtcagatcatcgtttcg  | B-for3 | tgggatgcccggttg      |
| A-rev3 | ccgcacaatctcattgcagcc | B-rev3 | gtgtgggcacattcctcagc |
|        |                       | B-for4 | tcacttagggcgtcgcttgg |
|        |                       | B-rev4 | ccccgagaacttctgactcc |

Appendix Figure S3: DNA motifs characterizing the centromeres of *T. brucei* (TbKKT3 binding sites)

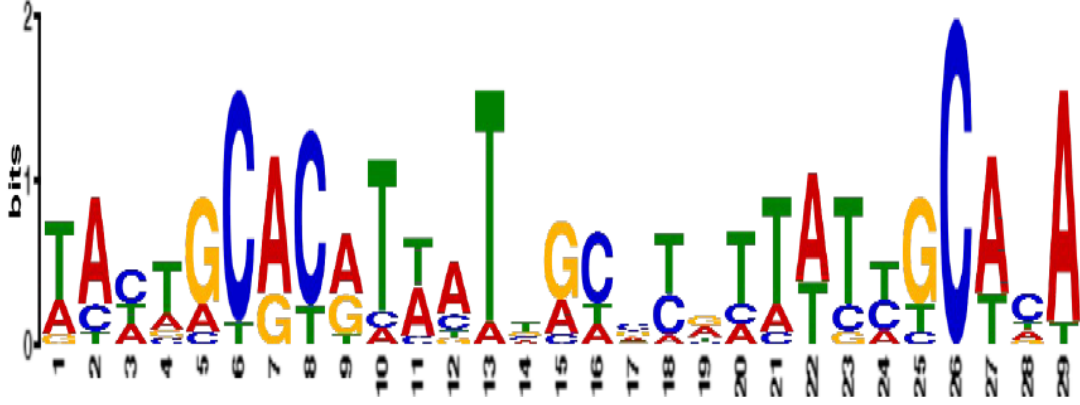

**Appendix TableS2 : Presence and Localization Retroposons in the Leishmania major centromeric sequences**

| Chromosome number | Coordinates of centromeres | Presence of Retroposon | LmSIDER 1 | LmSIDER 2 | LmDIRE | Coordinates of Retroposons and Remark                                                                                                                                                            |
|-------------------|----------------------------|------------------------|-----------|-----------|--------|--------------------------------------------------------------------------------------------------------------------------------------------------------------------------------------------------|
| >LmjF.01          | LmjF.01:268500..268899     | No                     |           |           |        |                                                                                                                                                                                                  |
| >LmjF.02          | LmjF.02:264600..269599     | Yes                    | 1         |           |        | LmjF.02: 265759..266339 (+)                                                                                                                                                                      |
| >LmjF.03          | LmjF.03:247700..253299     | Yes                    |           | 1         |        | LmjF.03: 252497..253066 (+)                                                                                                                                                                      |
| >LmjF.04          | LmjF.04:126000..131499     | No                     |           |           |        |                                                                                                                                                                                                  |
| >LmjF.05          | LmjF.05:361500..366799     | No                     |           |           |        |                                                                                                                                                                                                  |
| >LmjF.06          | LmjF.06:120889..129601     | No                     |           |           |        |                                                                                                                                                                                                  |
| >LmjF.07          | LmjF.07:209000..213799     | Yes                    | 2         | 1         | 1      | LmjF.07: LmSIDER2 LmjF.07: 209000..209299 (-) and LmSIDER1-LmDIRE (3.7 kb)-LmSIDER1 LmjF.07: 20964 209000+4679 (+)                                                                               |
| >LmjF.08          | LmjF.08:486100..492999     | Yes                    |           | 2         |        | LmjF.08: 486608..487168 (+) and LmjF.08: 491788..492360 (-)                                                                                                                                      |
| >LmjF.09          | LmjF.09:272500..276899     | No                     |           |           |        |                                                                                                                                                                                                  |
| >LmjF.10          | LmjF.10:295800..300699     | No                     |           |           |        |                                                                                                                                                                                                  |
| >LmjF.11          | LmjF.11:159000..162599     | Yes                    | 1         | 1         |        | LmSIDER1 LmjF.11: 159131..160049 (+) and LmSIDER2 LmjF.11: 162118..162599 (+)                                                                                                                    |
| >LmjF.12          | LmjF.12:286300..290999     | Yes*                   |           |           | 1      | 1 LmSIDER2 and 1 LmSIDER1 sequence 30 bp upstream the centromeric sequence and one LmSIDER2 40 bp downstream the centromeric sequence                                                            |
| >LmjF.13          | LmjF.13:143300..145099     | Yes*                   | 1         |           |        | LmSIDER1: 1117 bp downstream the centromeric sequence                                                                                                                                            |
| >LmjF.14          | LmjF.14:158300..162799     | Yes                    |           | 1         |        | LmjF.14: 162101..1617469 (+)                                                                                                                                                                     |
| >LmjF.15          | LmjF.15:323300..329099     | Yes                    |           | 1         |        | LmjF.15: 325989..326264 (-)                                                                                                                                                                      |
| >LmjF.16          | LmjF.16:340100..343899     | No                     |           |           |        |                                                                                                                                                                                                  |
| >LmjF.17          | LmjF.17:340300..343799     | Yes                    |           | 3         |        | 3 LmSIDER2 copies: 2 upstream the sequence, the second has 89 bp in the centromeric séquence , the third copy is 820 bp down to the centromeric sequence                                         |
| >LmjF.18          | LmjF.18:445000..448999     | Yes                    | 3         |           | 1      | 3 LmSIDER1 copies: 2 upstream the sequence, the second has 48 bp in the centromeric séquence ,the third copy is 479 bp downstream to the centromeric sequence<br>LmDIRE: LmjF.18: 445000..448004 |
| >LmjF.19          | LmjF.19:625500..631099     | Yes                    |           | 1         |        | LmSIDER2:downstrem the centromerci (163 bp included in the centromerci sequence)                                                                                                                 |
| >LmjF.20          | LmjF.20:523700..527299     | Yes                    |           | 1         |        | LmjF.20: 526597..527160 (-)                                                                                                                                                                      |
| >LmjF.21          | LmjF.21:225400..229699     | Yes                    |           | 2         |        | LmjF.21: 225215..225748 (-) and LmjF.21: 229172..229702 (+)                                                                                                                                      |
| >LmjF.22          | LmjF.22:606,000..612,000   | Yes                    |           | 2         |        | LmjF.22: 606565..607003 (+) and LmjF.22: 607884..608208 (-)                                                                                                                                      |
| >LmjF.23          | LmjF.23:550300..553999     | Yes*                   |           | 1         |        | LmSIDER2: 1 bp downstream the centromeric sequence                                                                                                                                               |

|          |                          |       |   |    |   |                                                                                             |
|----------|--------------------------|-------|---|----|---|---------------------------------------------------------------------------------------------|
| >LmjF.24 | LmjF.24:467300..470099   | Yes   |   | 1  |   | LmjF.24: 469346..469815 (+)                                                                 |
| >LmjF.25 | LmjF.25:586700..590099   | Yes   |   | 2  |   | LmjF.25: 586475..587100 (-) and LmjF.25: 589148..589717 (-)                                 |
| >LmjF.26 | LmjF.26:607800..610199   | Yes   |   | 1  |   | LmSIDER2: upstream the centromeric sequence with 26 bp included in the centromeric sequence |
| >LmjF.27 | LmjF.27:983200..987599   | No    |   |    |   |                                                                                             |
| >LmjF.28 | LmjF.28:821000..823899   | Yes   |   | 1  |   | LmjF.28: 821950..822304 (-)                                                                 |
| >LmjF.29 | LmjF.29:340400..343399   | Yes   | 1 | 1  | 1 | LmDIRE: LmjF.29: 341015..342916 (+) and LmSIDER2: LmjF.29: 343228..343800 (+)               |
| >LmjF.30 | LmjF.30:229500..232799   | No    |   |    |   |                                                                                             |
| >LmjF.31 | LmjF.31:778100..781199   | Yes   |   | 1  |   | LmjF.31: 780368..780848 (-)                                                                 |
| >LmjF.32 | LmjF.32:1169000..1172399 | Yes   |   | 2  |   | LmjF.32: 1168802.. 1169260 (+) and LmjF.32: 1170174..1170617 (+)                            |
| >LmjF.33 | LmjF.33:761900..765099   | Yes   |   | 1  |   | LmjF.33: 764818..765396 (+)                                                                 |
| >LmjF.34 | LmjF.34:299200..302699   | Yes   |   | 1  |   | LmjF.34: 302258..302702 (+)                                                                 |
| >LmjF.35 | LmjF.35:546700..549899   | No    |   |    |   |                                                                                             |
| >LmjF.36 | LmjF.36:1112100..1115899 | Yes   | 1 |    |   | LmjF.36: 1112172 1112412 (+)                                                                |
|          |                          | total | 9 | 26 | 4 |                                                                                             |
